# Supplementary material for: A bacterial riboswitch class for the thiamin precursor HMP-PP employs a terminator-embedded aptamer
Source: eLife. 2019 Apr 5;8:e45210. doi: 10.7554/eLife.45210 (PMC6478431; doi:10.7554/eLife.45210)
Supplement: Supplementary file 1. [file elife-45210-supp1.xlsx]

## Sheet: thiS_gene_context_5up_5down
Information on gene associatons for thiS motif RNA representatives
Atilho et al. and Breaker; A bacterial riboswitch class for the thiamin precursor HMP-PP employs a terminator-embedded aptamer
Genes for proteins with no annotated functions are label as 'unannotated'
Annotated genes with no known gene name are annotated with their corresponding protein family domain names
Dashes denote the absense of an annotated gene in that position
"1 down" indicates the first gene downstream of the motif, "2 down" is the second, etc…
"Gene Dir" designates the gene direction, where ">" indicates that the gene is in the same orientation as the motif, whereas "<" indicates that the gene is in the opposite orientation (on the opposite strand).
Gene Name	Enzyme Function
thiC	hydroxymethyl pyrimidine synthase
thiE	thiamin phosphate synthase
thiF	adenyltransferase
thiS	sulfur carrier protein
thiG	thiazole synthase
thiO	glycine oxidase
thiH	tyrosine lyase
thiI	sulfur transferase
thiM	thiazole kinase
thiN	thiamin pyrophosphokinase
thiD	hydroxymethyl pyrimidine (phosphate) kinase
thiL	thiamin phosphate kinase
thiK	thiamin kinase
tenI	thiazole tautomerase
Accession #	Gene (1 down)	Gene Dir. (1 down)	Gene (2 down)	Gene Dir. (2 down)	Gene (3 down)	Gene Dir. (3 down)	Gene (4 down)	Gene Dir. (4 down)	Gene (5 down)	Gene Dir. (5 down)
DLF012_scaffold123_1/25811-25875	thiS	>	unannotated	>	unannotated	>	unannotated	>	unannotated	>
DLF013_scaffold39570_1/15246-15183	thiS	>	unannotated	>	unannotated	>	unannotated	>	unannotated	>
4491420.3_NODE_36953/1879-1942	thiS	>	unannotated	>	-	-	-	-	-	-
NZ_BBZU01000010.1/66263-66327	thiS	>	thiF	>	thiG	>	thiH	>	tenI	>
scaffold4213_13_MH0074/8170-8107	thiS	>	unannotated	>	unannotated	>	unannotated	>	unannotated	<
NZ_AAXA02000015.1/51967-51904	thiS	>	thiG	>	thiH	>	yjbR	>	unannotated	>
SRS013261_C1604114/2892-2831	thiS	>	unannotated	>	unannotated	>	unannotated	>	-	-
NZ_AUFY01000001.1/117331-117272	thiS	>	thiF	>	thiG	>	thiH	>	tenI	>
NZ_JRNT01000005.1/242263-242205	thiS	>	thiF	>	thiG	>	thiH	>	tenI	>
NZ_LT635772.1/669762-669827	thiS	>	thiF	>	thiG	>	thiH	>	tenI	>
NZ_GG657760.1/197166-197101	thiS	>	thiF	>	thiG	>	thiH	>	tenI	>
scaffold3769_9_V1.CD-9/11440-11377	thiS	>	unannotated	>	unannotated	>	unannotated	>	unannotated	<
SRS023930_Baylor_scaffold_10525/10852-10910	thiS	>	unannotated	>	unannotated	>	unannotated	>	unannotated	>
NZ_AFUJ01000005.1/211836-211894	thiS	>	thiF	>	thiG	>	thiH	>	thiH	>
NZ_KQ960758.1/43801-43743	thiS	>	thiF	>	thiG	>	thiH	>	ThiE	>
NOM027_scaffold21829_1/54172-54107	thiS	>	unannotated	>	unannotated	>	unannotated	>	unannotated	>
SRS019125_WUGC_scaffold_9707/2146-2088	thiS	>	unannotated	>	unannotated	>	unannotated	>	-	-
NZ_FOOE01000023.1/47723-47654	thiW	>	PRK09355	>	YcjU	>	unannotated	>	Aldose_epim_lacX	<
NZ_KQ955273.1/8638-8576	thiS	>	thiF	>	thiG	>	thiH	>	ThiW	>
NZ_GG666044.1/333340-333278	thiW	>	PRK09355	>	tenI	>	MngR	<	PRK00507	<
NZ_GG666296.1/170944-171007	thiS	>	thiF	>	thiG	>	thiH	>	ThiW	>
NZ_JRMW01000037.1/13505-13443	thiS	>	thiF	>	thiG	>	thiH	>	ThiW	>
NZ_KQ955419.1/3608-3545	thiS	>	thiF	>	thiG	>	thiH	>	tenI	>
NZ_ABXX02000004.1/151409-151343	thiS	>	thiF	>	thiG	>	thiG	>	ansP	<
SRS058182_LANL_scaffold_12798/170-231	thiS	>	unannotated	>	unannotated	>	unannotated	>	-	-
NZ_HE978617.1/290018-289954	thiS	>	thiF	>	thiG	>	thiH	>	unannotated	>
NZ_ABXA01000010.1/31765-31701	thiS	>	thiF	>	thiG	>	thiH	>	thiW	>
NZ_GG729830.1/880581-880648	thiS	>	thiG	>	thiG	>	thiF	>	RHOD	>
NZ_JDUW01000002.1/117544-117477	thiS	>	thiG	>	thiF	>	RHOD|SirA_RHOD_Pry_redox|DrsE_2	>	rnaY	>
NZ_LT635465.1/134789-134725	thiS	>	thiF	>	thiG	>	thiH	>	tenI	>
longitudinal_467_50/11141-11206	thiS	>	unannotated	>	unannotated	>	unannotated	>	unannotated	>
NZ_CYYA01000004.1/165299-165233	thiS	>	thiF	>	thiG	>	thiH	>	tenI	>
longitudinal_463_94/63466-63401	thiS	>	unannotated	>	unannotated	>	unannotated	>	unannotated	>
longitudinal_422_248/111417-111352	thiS	>	unannotated	>	unannotated	>	unannotated	>	unannotated	>
NZ_DS499681.1/16452-16517	thiS	>	thiF	>	thiG	>	thiH	>	tenI	>
NOM027_scaffold121_5/16537-16601	thiS	>	unannotated	>	unannotated	>	unannotated	>	unannotated	<
NZ_FQZY01000038.1/38257-38323	thiS	>	thiF	>	thiG	>	thiH	>	tenI	>
NZ_CZBR01000004.1/98819-98745	thiS	>	thiF	>	thiG	>	thiH	>	thiE	>
NZ_CZBS01000010.1/14420-14494	thiS	>	thiF	>	thiG	>	thiH	>	thiE	>
longitudinal_441_216/32032-32101	thiS	>	unannotated	>	unannotated	>	unannotated	>	unannotated	>
NZ_GL870812.1/395258-395323	thiS	>	thiF	>	thiG	>	thiH	>	tenI	>
NZ_AUAN01000009.1/90545-90481	thiS	>	thiF	>	thiG	>	thiH	>	tenI	>
DLF012_scaffold7384_4/1686-1622	thiS	>	unannotated	>	unannotated	>	-	-	-	-
NC_016077.1/2106141-2106206	thiS	>	thiF	>	thiG	>	thiH	>	tenI	>
DOM012_scaffold40528_1/13161-13089	thiS	>	unannotated	>	unannotated	>	unannotated	>	unannotated	>
NZ_KK366010.1/10005-9932	thiG	>	thiH	>	unannotated	>	XRE	>	DHAK_reg	<
NZ_BCYE01000006.1/158764-158831	thiS	>	thiF	>	thiG	>	ansP	<	unannotated	<
PRSSGFe2_Sequence0000044475/353-421	gene for protein of unannotated function	>	thiW	>	-	-	-	-	-	-
NZ_ADAM01000008.1/103446-103364	ybbW	>	PRK08044	>	thiS	>	thiF	>	thiG	>
NC_013721.1/873290-873372	ybbW	>	PRK08044	>	thiS	>	thiF	>	thiG	>
NZ_JDTL01000006.1/212915-212848	thiS	>	thiF	>	thiG	>	ansP	<	apbE	>
NZ_LWSR01000046.1/12773-12691	ybbW	>	PRK08044	>	thiS	>	thiF	>	thiG	>
NZ_JHVC01000001.1/338411-338482	gene for protein of unannotated function	>	thiW	>	PRK09355	>	ycjU	>	degV	<
NC_011593.1/2042180-2042116	thiS	>	thiG	>	thiG	>	thiF	>	RHOD	>
longitudinal_311_125/6141-6223	thiS	>	unannotated	>	unannotated	>	unannotated	>	unannotated	>
longitudinal_123_28/23869-23787	thiS	>	unannotated	>	unannotated	>	unannotated	>	unannotated	>
longitudinal_447_77/15528-15446	thiS	>	unannotated	>	unannotated	>	unannotated	>	unannotated	>
NZ_JDTX01000003.1/272875-272941	thiS	>	thiF	>	thiG	>	ABC_cobalt	<	-	-
NZ_CWHU01000004.1/34039-33978	thiS	>	thiF	>	thiG	>	thiH	>	tenI	>
NZ_JDUT01000003.1/153684-153758	thiS	>	thiG	>	thiF	>	RHOD	>	rnaY	>
NC_014638.1/2097846-2097913	thiS	>	thiG	>	riboflavin-specific deaminase	<	DPM1_like_bac	>	DUF4012	<
NC_020546.1/167840-167775	thiS	>	thiF	>	thiG	>	thiG	>	ansP	<
NZ_HE978532.1/330972-330911	thiS	>	thiF	>	thiG	>	thiH	>	thiW	>
NC_014616.1/2070915-2070983	thiS	>	thiG	>	thiG	>	riboflavin deaminase	<	DPM1_like_bac	>
NZ_ATXM01000006.1/45858-45924	thiS	>	thiF	>	thiF	>	thiG	>	thiG	>
NZ_JDUU01000004.1/73062-73137	thiS	>	thiG	>	unannotated	<	unannotated	<	ansP	<
4448820.3_Contig_52378/351-429	-	-	-	-	-	-	-	-	-	-
NZ_KE384010.1/126003-126081	thiS	>	thiF	>	thiG	>	thiH	>	DHQS	<
NZ_AZMV01000007.1/199671-199604	thiS	>	thiF	>	thiG	>	ansP	<	unannotated	<
NZ_GG663535.1/83070-83137	thiS	>	thiF	>	thiG	>	thiG	>	ansP	<
scaffold46346_2_V1.UC-19/110-44	-	-	-	-	-	-	-	-	-	-
NZ_ABXY01000001.1/140628-140562	thiS	>	thiF	>	thiG	>	thiG	>	ansP	<
4448817.3_Contig61/2180-2114	thiS	>	unannotated	>	unannotated	>	unannotated	>	unannotated	>
scaffold681_3_MH0069/6440-6374	thiS	>	unannotated	>	unannotated	>	unannotated	<	unannotated	<
4448814.3_Contig2538/777-844	thiS	>	unannotated	>	unannotated	>	unannotated	>	-	-
NZ_LBIB01000014.1/134949-135015	thiS	>	thiF	>	thiG	>	ansP	<	Smc|FtsX	<
NZ_LN865152.1/585540-585475	thiS	>	thiF	>	thiG	>	thiH	>	tenI	>
NZ_JYHN01000061.1/208333-208270	thiS	>	thiF	>	thiG	>	thiH	>	tenI	>
NOF005_scaffold18982_6/410-341	thiS	>	-	-	-	-	-	-	-	-
scaffold39306_3_V1.CD-6/403-340	thiS	>	unannotated	>	-	-	-	-	-	-
scaffold12002_14_MH0038/906-969	thiS	>	unannotated	>	unannotated	>	unannotated	>	-	-
scaffold35237_2_O2.UC-23/1449-1386	thiS	>	unannotated	>	unannotated	>	-	-	-	-
NZ_JGYS01000022.1/18570-18497	thiS	>	thiG	>	thiF	>	RHOD	>	rnaY	>
NZ_DS990261.1/673203-673141	thiS	>	thiF	>	thiG	>	thiH	>	tenI	>
NZ_ATXD01000006.1/1204042-1203980	thiS	>	thiF	>	thiG	>	thiH	>	tenI	>
NZ_JPJE01000002.1/86051-85974	thiS	>	thiF	>	thiG	>	thiH	>	tenI	>
NZ_BCFK01000028.1/31954-31882	thiS	>	thiG	>	thiF	>	RHOD	>	rnaY	>
NZ_BCAA01000013.1/55094-55157	thiS	>	unannotated	>	thiG	>	thiH	>	tenI	>
NZ_BBDW01000004.1/133675-133740	thiS	>	thiF	>	thiG	>	unannotated	>	thiE	>
NC_013171.1/1778347-1778281	thiS	>	thiF	>	thiG	>	thiH	>	thiW	>
NZ_JGZP01000004.1/49631-49703	thiS	>	thiG	>	thiF	>	RHOD	>	rnaY	>
DLF012_scaffold15462_1/39557-39493	thiS	>	unannotated	>	unannotated	>	unannotated	>	unannotated	>
NZ_KE150456.1/35273-35337	thiS	>	thiG	>	thiG	>	thiF	>	RHOD	>
DOF008_scaffold54_7/336-399	thiS	>	unannotated	>	unannotated	>	-	-	-	-
NLM027_scaffold32909_2/24335-24398	thiS	>	unannotated	>	unannotated	>	unannotated	>	unannotated	<
NOM009_scaffold2531_3/594-657	thiS	>	unannotated	>	-	-	-	-	-	-
scaffold41532_1_MH0062/172-109	-	-	-	-	-	-	-	-	-	-
4491413.3_NODE_57071/4062-3999	thiG	>	thiH	>	unannotated	>	-	-		-
NZ_DS264391.1/268653-268588	thiS	>	thiF	>	thiG	>	thiH	>	tenI	>
DOM003_scaffold18204_7/470-406	thiS	>	unannotated	>	-	-	-	-	-	-
DOF008_scaffold21275_2/40714-40779	thiS	>	thiF	>	unannotated	>	unannotated	>	unannotated	>
scaffold7380_7_V1.CD-1/2193-2256	-	-	-	-	-	-	-	-	-	-
DOF012_scaffold988_2/398-461	-	-	-	-	-	-	-	-	-	-
BABE01007008.1/152-89	-	-	-	-	-	-	-	-	-	-
scaffold59825_2_MH0073/301-238	thiS	>	-	-	-	-	-	-	-	-
NZ_GG662006.1/72741-72805	thiS	>	thiF	>	thiG	>	thiH	>	tenI	>
SRS017103_C2712510/1394-1330	thiS	>	unannotated	>	unannotated	>	-	-	-	-
UnmappedStool_Broad_scaffold_47646/347-413	thiS	>	unannotated	>	-	-	-	-	-	-
NZ_KI271128.1/80751-80817	thiS	>	thiF	>	thiG	>	thiH	>	tenI	>
4448815.3_Contig14427/683-620	thiS	>	unannotated	>	-	-	-	-	-	-
4448811.3_Contig2118/441-376	-	-	-	-	-	-	-	-	-	-
NZ_JH601090.1/635572-635507	thiS	>	thiF	>	thiG	>	thiH	>	unannotated	>
NOM009_scaffold45418_3/807-743	thiS	>	unannotated	>	-	-	-	-	-	-
longitudinal_191_369/160521-160585	thiS	>	unannotated	>	unannotated	>	unannotated	>	unannotated	>
NZ_JDUB01000015.1/62311-62246	thiS	>	thiF	>	thiG	>	ansP	<	unannotated	<
UnmappedStool_Broad_scaffold_707906/458-395	thiS	>	unannotated	>	-	-	-	-	-	-
NZ_HE578907.1/1106107-1106045	thiS	>	thiF	>	thiG	>	thiH	>	thiW	>
scaffold152691_5_MH0006/181-118	-	-	-	-	-	-	-	-	-	-
NZ_JHXK01000013.1/51367-51430	thiS	>	thiG	>	thiH	>	acrR	<	efflux_EmrB	>
SRS015578_WUGC_scaffold_36880/1856-1920	thiS	>	unannotated	>	unannotated	>	unannotated	>	unannotated	>
scaffold3557_1_MH0056/1857-1793	thiS	>	unannotated	>	unannotated	>	-	-	-	-
SRS016267_WUGC_scaffold_19539/829-764	thiS	>	unannotated	>	-	-	-	-	-	-
NZ_CZBA01000002.1/39449-39386	thiS	>	thiG	>	thiH	>	tenI	>	DUF45	>
NLM027_scaffold9458_1/23903-23840	thiS	>	unannotated	>	unannotated	>	unannotated	>	unannotated	>
NOM009_scaffold11825_2/20025-20090	thiS	>	unannotated	>	unannotated	>	unannotated	>	unannotated	>
NZ_JALU01000018.1/34615-34679	thiS	>	thiF	>	thiG	>	thiH	>	tenI	>
SRS018791_WUGC_scaffold_46990/872-936	thiS	>	unannotated	>	unannotated	>	unannotated	>	unannotated	>
SRS019601_WUGC_scaffold_9737/8348-8285	thiS	>	unannotated	>	unannotated	>	unannotated	>	bSCRAP50|bSCRAP134	<
NOM005_scaffold50645_4/30102-30039	thiS	>	unannotated	>	unannotated	>	unannotated	>	bSCRAP50|bSCRAP102|bSCRAP134	<
SRS011306_Baylor_scaffold_28333/580-516	thiS	>	unannotated	>	-	-	-	-	-	-
SRS056323_C2629103/557-621	thiS	>	unannotated	>	unannotated	>	unannotated	>	-	-
SRS015264_WUGC_scaffold_24690/18501-18564	thiS	>	unannotated	>	unannotated	>	unannotated	>	bSCRAP50|bSCRAP134	<
SRS064276_LANL_scaffold_6044/2360-2423	thiS	>	unannotated	>	unannotated	>	-	-	-	-
DLM018_scaffold22925_2/839-914	thiS	>	unannotated	>	unannotated	>	unannotated	>	unannotated	>
4448819.3_Contig4174/916-841	thiS	>	unannotated	>	unannotated	>	-	-	-	-
DLF014_scaffold5011_2/8274-8199	thiS	>	unannotated	>	unannotated	>	unannotated	>	unannotated	>
DOM026_scaffold37373_1/121-188	thiS	>	unannotated	>	unannotated	>	-	-	-	-
SRS016095_C2552391/78-11	-	-	-	-	-	-	-	-	-	-
NLM022_scaffold12267_10/31292-31366	thiS	>	unannotated	>	unannotated	>	unannotated	<	unannotated	>
SRS058182_C1832718/112-173	thiS	>	thiF	>	-	-	-	-	-	-
NZ_KB976103.1/913631-913702	thiS	>	thiF	>	thiG	>	thiH	>	tenI	>
SRS019327_C2786174/575-508	thiS	>	unannotated	>	-	-	-	-	-	-
SRS015797_C2648657/639-705	thiS	>	thiF	>	-	-	-	-	-	-
BABF01000976.1/918-983	thiS	>	unannotated	>	unannotated	>	unannotated	>	unannotated	>
2205800605/282-347	-	-	-	-	-	-	-	-	-	-
SRMUA_GMSDS1U03GR2EV/185-252	thiS	>	-	-	-	-	-	-	-	-
NZ_ABDQ01000001.1/162792-162725	thiG	>	thiH	>	ompR	>	ccmA	>	ABC2_membrane_4	>
NZ_AUJC01000006.1/107543-107478	thiS	>	thiF	>	thiG	>	thiH	>	tenI	>
SRS049147_LANL_scaffold_62633/7844-7777	thiS	>	unannotated	>	unannotated	>	unannotated	>	unannotated	>
SRS057791_LANL_scaffold_82374/298-236	thiS	>	-	-	-	-	-	-	-	-
SRS012279_C2693938/696-765	-	-	-	-	-	-	-	-	-	-
NZ_CM000955.1/1121392-1121452	thiS	>	thiF	>	thiG	>	thiH	>	DUF1016	<
NLF013_scaffold27566_11/2606-2537	thiS	>	unannotated	>	unannotated	>	unannotated	>	-	-
NZ_KQ960155.1/64078-64022	thiS	>	thiF	>	thiG	>	thiH	>	thiE	>
NZ_KQ959287.1/1415-1336	gltP	>	-	-	-	-	-	-	-	-
NZ_FLQT01000003.1/307201-307144	thiS	>	thiF	>	thiG	>	thiH	>	thiE	>
NC_013204.1/2056464-2056398	thiS	>	thiF	>	thiG	>	thiH	>	tenI	>
NC_013895.2/1058235-1058178	thiS	>	thiF	>	thiF	>	thiG	>	thiH	>
UnmappedStool_Broad_scaffold_116807/213-152	thiS	>	-	-	-	-	-	-	-	-
4491686.3.644886/70-130	-	-	-	-	-	-	-	-	-	-
4491686.3.1061908/524-464	thiM	>	-	-	-	-	-	-	-	-
NZ_CYUK01000003.1/389364-389307	thiS	>	thiF	>	thiG	>	thiH	>	2A0111	<
PRSSGFe2_Sequence0000006128/3601-3535	thiS	>	thiF	>	thiG	>	thiH	>	thiE	>
NZ_ACXX02000001.1/246015-245947	thiS	>	thiF	>	thiG	>	thiH	>	thiE	>
NZ_JH378832.1/138121-138062	thiS	>	thiF	>	thiF	>	thiG	>	thiH	>
SRS023595_C6872639/52-136	-	-	-	-	-	-	-	-	-	-
SRS049318_LANL_scaffold_177681/428-512	uvrB	>	-	-	-	-	-	-	-	-
SRS016095_WUGC_scaffold_28798/106375-106311	thiS	>	unannotated	>	unannotated	>	unannotated	>	unannotated	>
SRS050244_LANL_scaffold_94267/6599-6532	thiS	>	unannotated	>	unannotated	>	unannotated	>	unannotated	>
UnmappedStool_Broad_scaffold_1087674/4205-4285	thiS	>	unannotated	>	unannotated	>	-	-	-	-
SRS047634_LANL_scaffold_138515/11216-11300	uvrB	>	thrE	>	unannotated	>	-	-	-	-
SRS011586_C3284111/251-171	thiS	>	-	-	-	-	-	-	-	-
SRS024081_C2643375/526-453	thiS	>	unannotated	>	-	-	-	-	-	-
SRS058336_C2181283/4723-4656	thiS	>	unannotated	>	unannotated	>	unannotated	>	unannotated	>
scaffold65129_1_MH0045/1376-1456	thiS	>	unannotated	>	-	-	-	-	-	-
NC_016894.1/53544-53607	thiS	<	thiG	>	thiH	>	tenI	>	-	-
SRS017521_C2601029/162-231	thiS	>	-	-	-	-	-	-	-	-
NZ_LHUR01000042.1/339358-339437	thiS	>	thiF	>	thiG	>	thiH	>	tenI	>
UnmappedStool_Broad_C252266792/194-264	thiS	>	-	-	-	-	-	-	-	-
NC_008593.1/595606-595672	thiG	>	thiH	>	nupC	>	-	-	-	-
NZ_FQXL01000005.1/206694-206631	thiS	>	thiF	>	thiG	>	thiH	>	nagC	>
NZ_LZFO01000017.1/20508-20442	thiS	>	thiG	>	thiH	>	abiH	>	ykuD	>
NZ_CP011803.1/269412-269475	thiS	>	thiF	>	thiG	>	thiH	>	PTZ00305	<
longitudinal_225_258/1642-1715	thiS	>	unannotated	>	unannotated	>	unannotated	>	unannotated	>
NZ_MIEH01000019.1/39083-39147	thiS	>	thiF	>	thiG	>	tenI	>	fruc_bis_ald_	>
NZ_ABDT01000097.2/20036-19969	thiS	>	thiF	>	unannotated	<	thiG	>	thiH	>
SRS064423_LANL_scaffold_55266/62080-62142	thiS	>	unannotated	>	unannotated	>	unannotated	>	unannotated	>
4491413.3_NODE_1966/14774-14711	thiS	>	unannotated	>	unannotated	>	unannotated	>	unannotated	>
NZ_FRCP01000009.1/263847-263913	thiS	>	thiF	>	thiG	>	thiH	>	tenI	>
DOM013_scaffold4642_1/27190-27263	thiS	>	unannotated	>	unannotated	>	unannotated	>	unannotated	>
NC_020291.1/5413289-5413222	thiS	>	thiF	>	thiG	>	thiH	>	thiE	>
longitudinal_448_90/2525-2589	thiS	>	unannotated	>	unannotated	>	unannotated	>	unannotated	>
NZ_FRAD01000004.1/17080-17147	thiS	>	thiF	>	thiG	>	unannotated	>	unannotated	>
longitudinal_414_23/26064-26000	thiS	>	unannotated	>	unannotated	>	unannotated	>	-	-
NZ_CZBX01000005.1/150749-150823	thiS	>	thiF	>	thiG	>	thiH	>	thiE	>
NOM002_scaffold30036_3/31315-31249	thiS	>	unannotated	>	unannotated	>	unannotated	>	unannotated	>
SRS054956_LANL_scaffold_1066/30487-30418	thiS	>	unannotated	>	unannotated	>	unannotated	>	unannotated	>
NLM022_scaffold1652_15/2888-2956	thiS	>	unannotated	>	-	-	-	-	-	-
NZ_CP015756.1/413495-413562	thiS	>	thiF	>	thiG	>	thiH	>	tenI	>
SRS077730_LANL_scaffold_728/26091-26160	thiS	>	unannotated	>	unannotated	>	unannotated	>	unannotated	>
NOM015_scaffold24_1/21794-21724	thiS	>	unannotated	>	unannotated	>	unannotated	>	unannotated	>
NZ_APHX01000001.1/35251-35326	thiS	>	thiG	>	thiH	>	tenI	>	cysteine_hydrolases	>
SRS053214_LANL_scaffold_9800/44041-43973	thiS	>	unannotated	>	unannotated	>	unannotated	>	unannotated	>
NZ_LJFK01000067.1/10128-10195	thiS	>	thiF	>	thiG	>	thiH	>	thiE	>
scaffold11731_1_V1.CD-9/639-708	thiS	>	unannotated	>	-	-	-	-	-	-
NZ_LAGN01000105.1/48470-48537	thiS	>	unannotated	>	thiG	>	thiH	>	tenI	>
SRS023526_Baylor_scaffold_33416/636-707	thiS	>	unannotated	>	unannotated	>	-	-	-	-
SRS065278_LANL_scaffold_42881/202-132	thiS	>	-	-	-	-	-	-	-	-
SRS024441_C3123295/1850-1917	thiS	>	unannotated	>	unannotated	>	unannotated	>	unannotated	>
NLM022_scaffold44466_1/121-188	thiS	>	unannotated	>	unannotated	>	-	-	-	-
BMHBC_1_1_newblercontig420570/131-63	-	-	-	-	-	-	-	-	-	-
SRS018313_Baylor_scaffold_13739/4217-4151	thiS	>	unannotated	>	unannotated	>	unannotated	>	unannotated	>
NZ_FRAK01000002.1/151848-151923	thiS	>	thiG	>	thiH	>	tenI	>	cysteine_hydrolases	>
DLM014_scaffold4124_2/30917-30850	thiS	>	unannotated	>	unannotated	>	unannotated	>	unannotated	>
SRS014235_WUGC_scaffold_2156/36511-36443	thiS	>	unannotated	>	unannotated	>	unannotated	>	unannotated	>
NZ_FNJF01000012.1/38335-38402	thiS	>	thiF	>	thiG	>	thiH	>	tenI	>
NOM029_scaffold2148_1/4197-4265	thiS	>	unannotated	>	unannotated	>	unannotated	>	unannotated	>
NZ_MQNM01000006.1/27970-28039	thiS	>	thiG	>	thiH	>	tenI	>	Isochorismatase	>
NZ_LAGM01000289.1/5842-5909	thiS	>	thiF	>	thiG	>	thiH	>	unannotated	>
scaffold103831_1_MH0035/1084-1150	thiS	>	unannotated	>	-	-	-	-	-	-
NOM023_scaffold4939_12/19963-20031	-	-	-	-	-	-	-	-	-	-
SRS056622_LANL_scaffold_22326/4312-4382	thiS	>	unannotated	>	unannotated	>	unannotated	>	unannotated	>
SRS011271_C3151945/347-413	thiG	>	unannotated	>	-	-	-	-	-	-
DOF008_scaffold28982_2/926-1000	thiS	>	unannotated	>	unannotated	>	unannotated	>	unannotated	>
NZ_FCOU01000002.1/16054-16120	thiS	>	unannotated	>	thiG	>	thiH	>	tenI	>
NZ_KB290749.1/12451-12384	thiS	>	thiF	>	thiG	>	thiH	>	thiE	>
ANASMECb_4085297_C7752/847300-847229	thiS	>	thiF	>	thiG	>	thiH	>	thiE	>
scaffold691_1_V1.CD-13/901-970	thiS	>	unannotated	>	-	-	-	-	-	-
NZ_LLKB01000005.1/1362873-1362794	thiG	>	thiH	>	tenI	>	MCP_signal|FeFe_hydrog_B1|FeS	>	MA|HAMP	>
SRS075404_LANL_scaffold_66215/6670-6603	thiS	>	unannotated	>	unannotated	>	unannotated	>	unannotated	>
NLM001_scaffold17342_4/16863-16792	thiG	>	unannotated	>	unannotated	>	unannotated	>	unannotated	>
NZ_LAGO01000729.1/2262-2329	thiS	>	thiF	>	thiG	>	thiH	>	thiE	>
SRS053335_LANL_scaffold_31227/148-215	thiS	>	unannotated	>	unannotated	>	unannotated	>	unannotated	>
scaffold16470_10_MH0081/1002-933	thiS	>	unannotated	>	-	-	-	-	-	-
NZ_CYYH01000004.1/184767-184844	thiS	>	thiG	>	thiH	>	PGMB-YQAB-SF	>	pyrF	>
SRS014235_WUGC_scaffold_115402/10608-10535	thiS	>	unannotated	>	unannotated	>	unannotated	>	unannotated	>
NZ_KQ960933.1/22130-22064	thiS	>	thiG	>	thiH	>	tenI	>	unannotated	<
NZ_FLKM01000008.1/244632-244564	thiS	>	thiF	>	thiG	>	thiH	>	tenI	>
4491414.3_NODE_6725/22438-22503	thiS	>	unannotated	>	unannotated	>	unannotated	>	unannotated	>
PBDCA2_FIDWTPW02QFA4Z/124-198	thiS	>	-	-	-	-	-	-	-	-
NOM010_scaffold3965_18/132-56	-	-	-	-	-	-	-	-	-	-
scaffold25055_1_V1.CD-13/3660-3583	thiM	>	unannotated	>	unannotated	>	unannotated	<	unannotated	<
SRS044662_LANL_scaffold_46222/4308-4243	thiS	>	unannotated	>	unannotated	>	unannotated	>	unannotated	>
4491487.3_NODE_104912/10315-10246	thiS	>	unannotated	>	unannotated	>	unannotated	>	unannotated	<
NZ_ASXP01000003.1/752049-751982	thiS	>	thiF	>	thiG	>	thiH	>	thiE	>
NLF011_scaffold24096_2/10252-10186	thiS	>	unannotated	>	unannotated	>	unannotated	>	unannotated	<
4444164.3.58515/338-412	-	-	-	-	-	-	-	-	-	-
SRS017497_C158633/140-58	-	-	-	-	-	-	-	-	-	-
JGI994J12354_10202935/357-277	thiS	>	-	-	-	-	-	-	-	-
MC6.MG1.AS1.C25849/83-147	-	-	-	-	-	-	-	-	-	-
SRS053214_C1407007/19-79	thiS	>	-	-	-	-	-	-	-	-
scaffold93670_2_V1.CD-14/1171-1231	thiS	>	unannotated	>	unannotated	>	unannotated	>	unannotated	>
NZ_CP018335.1/1785726-1785662	thiS	>	thiF	>	thiG	>	thiH	>	tenI	>
NC_011898.1/1362935-1362854	gene for protein of unannotated function	<	padR	<	PRK08348	<	Dockerin_I|CotH|Fn3_assoc	>	BltR2	<
MC6.MG1.AS1.C58637/4-68	gene for protein of unannotated function	<	-	-	-	-	-	-	-	-
SRS057539_C2705035/788-855	-	-	-	-	-	-	-	-	-	-
NZ_JMFY01000006.1/12655-12583	thiS	>	thiF	>	thiG	>	thiH	>	tenI	>
SRS022719_LANL_scaffold_70784/1517-1447	thiS	>	unannotated	>	unannotated	>	-	-	-	-
BAAX01019823.1/5-73	thiS	>	unannotated	>	-	-	-	-	-	-
SRS023958_C2053255/1406-1343	thiS	>	unannotated	>	unannotated	>	-	-	-	-
DLM019_scaffold14691_1/1-71	thiS	>	unannotated	>	-	-	-	-	-	-
SRS015055_C1655330/8-80	thiS	>	unannotated	>	-	-	-	-	-	-
Subgingival_plaque_LANL_C11289333/8-72	thiS	>	unannotated	>	-	-	-	-	-	-
NOM029_scaffold19544_4/14305-14237	thiG	>	unannotated	>	unannotated	>	unannotated	>	unannotated	>
DLM002_scaffold8638_27/494-426	-	-	-	-	-	-	-	-	-	-
NLF005_scaffold1745_7/245-177	-	-	-	-	-	-	-	-	-	-
scaffold3951_4_MH0040/1030-966	thiS	>	unannotated	>	-	-	-	-	-	-
SRS018357_Baylor_scaffold_53805/3639-3572	thiS	>	unannotated	>	unannotated	>	unannotated	>	unannotated	>
NZ_JRNB01000047.1/30598-30665	thiS	>	thiF	>	thiG	>	thiH	>	tenI	>
UnmappedStool_Broad_scaffold_521980/1983-2043	thiS	>	unannotated	>	-	-	-	-	-	-
scaffold9720_8_MH0034/4609-4678	thiS	>	unannotated	>	unannotated	>	-	-	-	-
scaffold57848_1_MH0046/571-640	thiS	>	unannotated	>	unannotated	>	unannotated	>	unannotated	>
DLM010_scaffold403_24/5762-5831	thiS	>	unannotated	>	unannotated	>	unannotated	>	unannotated	>
scaffold16603_1_MH0073/4116-4047	thiS	>	unannotated	>	unannotated	>	unannotated	>	unannotated	>
scaffold49076_1_V1.UC-6/3421-3485	thiS	>	unannotated	>	unannotated	>	-	-	-	-
scaffold62622_1_MH0071/229-165	-	-	-	-	-	-	-	-	-	-
scaffold68734_2_O2.UC-20/63-129	thiS	>	unannotated	>	-	-	-	-	-	-
DLM019_scaffold22940_15/55-121	thiS	>	unannotated	>	-	-	-	-	-	-
scaffold77712_3_MH0083/361-299	thiS	>	-	-	-	-	-	-	-	-
scaffold11133_4_MH0086/24977-25042	thiS	>	unannotated	>	unannotated	>	unannotated	>	unannotated	>
SRS044662_LANL_scaffold_45308/30563-30626	thiS	>	unannotated	>	unannotated	>	unannotated	>	unannotated	>
SRS022719_LANL_scaffold_59314/4620-4683	thiS	>	-	-	-	-	-	-	-	-
scaffold69626_1_MH0014/673-743	-	-	-	-	-	-	-	-	-	-
SRS014923_WUGC_scaffold_46432/12504-12574	thiS	>	unannotated	>	-	-	-	-	-	-
UnmappedStool_Broad_scaffold_883535/3151-3088	gene for protein of unannotated function	>	rpstblastn	>	unannotated	>	-	-	-	-
NZ_JH590894.1/25139-25072	thiS	>	thiF	>	thiG	>	thiH	>	tenI	>
BAAV01021035.1/907-839	thiS	>	unannotated	>	-	-	-	-	-	-
NZ_JIBU02000023.1/140095-140032	thiS	>	thiF	>	thiG	>	thiH	>	PTZ00305	<
NZ_LN890328.1/653046-652978	thiS	>	thiF	>	thiG	>	thiH	>	tenI	>
NZ_KQ958143.1/48437-48510	thiS	>	thiG	>	thiH	>	tenI	>	cysteine_hydrolases	>
scaffold14974_4_MH0012/860-785	thiS	>	unannotated	>	-	-	-	-	-	-
4448812.3_Contig7964/235-159	thiS	>	-	-	-	-	-	-	-	-
longitudinal_51_3/52447-52513	thiS	>	unannotated	>	unannotated	>	unannotated	>	unannotated	>
NZ_AUDP01000013.1/52075-52009	thiS	>	thiF	>	thiG	>	thiH	>	tenI	>
UnmappedStool_Broad_scaffold_961672/728-792	thiS	>	-	-	-	-	-	-	-	-
contig28681/1351-1423	-	-	-	-	-	-	-	-	-	-
NZ_LODR01000023.1/146284-146214	thiS	>	thiG	>	thiH	>	CGS_like	<	Branch_AA_trans	<
BMHB3a_c152290/7010-6947	thiS	>	unannotated	>	unannotated	>	unannotated	>	unannotated	<
NZ_DS560019.1/321220-321156	thiS	>	thiF	>	thiG	>	thiH	>	tenI	>
DLF014_scaffold1211_1/10433-10364	thiS	>	unannotated	>	unannotated	>	unannotated	<	unannotated	<
SRS020856_C2591480/224-294	thiS	>	unannotated	>	-	-	-	-	-	-
DLM013_scaffold37768_2/960-891	thiS	>	unannotated	>	-	-	-	-	-	-
NZ_AWXA01000037.1/113056-113125	thiS	>	thiG	>	thiH	>	thiF	>	tenI	>
NZ_JH417615.1/19698-19626	thiS	>	thiG	>	thiH	>	thiF	>	tenI	>
SRS023352_LANL_scaffold_20095/559-628	thiS	>	unannotated	>	unannotated	>	unannotated	>	-	-
SRS024277_C2718510/220-148	thiS	>	-	-	-	-	-	-	-	-
SRS023926_Baylor_scaffold_74340/1707-1776	thiS	>	unannotated	>	-	-	-	-	-	-
NZ_CM001240.1/4927840-4927779	thiS	>	unannotated	<	thiG	>	thiH	>	sigma70-ECF	<
DOF004_scaffold38144_16/1511-1445	thiM	>	unannotated	>	-	-	-	-	-	-
scaffold33059_2_MH0083/450-516	-	-	-	-	-	-	-	-	-	-
NZ_LODR01000030.1/146882-146810	ansP	>	ybbA	<	HAD	>	COG4922	<	iscR	<
NC_015873.1/1572756-1572685	ansP	>	transposase	<	insQ	<	unannotated	<	PDDEXK_2	<
4448818.3_Contig5329/1047-1119	ansP	>	-	-	-	-	-	-	-	-
4448813.3_Contig1951/1299-1226	ansP	>	-	-	-	-	-	-	-	-
DLM005_scaffold140_4/5496-5568	ansP	>	unannotated	<	unannotated	>	unannotated	>	unannotated	>
NZ_APHX01000034.1/13346-13417	ansP	>	ybbA	<	DNA helicase	<	DNA2|Vsr	<	unannotated	<
NOM027_scaffold44_2/1174-1246	thiS	>	-	-	-	-	-	-	-	-
UnmappedStool_Broad_scaffold_1066553/444-507	thiW	>	-	-	-	-	-	-	-	-
NLM021_scaffold45097_2/904-968	thiS	>	unannotated	>	unannotated	>	-	-	-	-
scaffold17462_2_V1.UC-8/9737-9802	thiS	>	unannotated	>	unannotated	>	unannotated	>	-	-
scaffold43484_2_MH0060/163-227	thiS	>	-	-	-	-	-	-	-	-
scaffold1162_15_MH0065/5580-5508	thiM	>	unannotated	>	unannotated	>	unannotated	<	unannotated	<
NZ_AUFC01000015.1/7666-7737	thiS	>	thiF	>	thiG	>	thiH	>	thiE	>
NZ_KB822499.1/357178-357244	thiS	>	thiG	>	thiH	>	thiE	>	unannotated	<
SRS057478_LANL_scaffold_23459/602-527	thiS	>	unannotated	>	-	-	-	-	-	-
DOM003_scaffold572_6/143-69	-	-	-	-	-	-	-	-	-	-
scaffold7812_5_MH0080/320-395	thiS	>	unannotated	>	-	-	-	-	-	-
C3286676_1_O2.UC-20/238-163	thiS	>	-	-	-	-	-	-	-	-
NZ_JH470528.1/10123-10190	thiS	>	thiF	>	thiG	>	thiH	>	thiE	>
NZ_LUAU01000001.1/1517999-1518066	thiS	>	thiF	>	thiG	>	thiH	>	thiE	>
JS586200.1/23-98	thiS	>	unannotated	>	-	-	-	-	-	-
scaffold65784_2_V1.CD-14/361-296	thiS	>	-	-	-	-	-	-	-	-
DOM003_scaffold2919_2/4988-4923	thiS	>	unannotated	>	unannotated	>	unannotated	>	unannotated	>
NOM002_scaffold26301_1/6666-6601	thiS	>	unannotated	>	unannotated	>	unannotated	>	unannotated	>
SRS050422_LANL_scaffold_94722/1166-1232	thiS	>	unannotated	>	unannotated	>	unannotated	>	unannotated	>
SRS015264_WUGC_scaffold_69589/4105-4038	thiS	>	unannotated	>	unannotated	>	unannotated	>	unannotated	>
scaffold17667_2_MH0012/1961-2022	thiS	>	unannotated	>	unannotated	>	-	-	-	-
NC_012781.1/211069-211006	thiS	>	thiG	>	thiH	>	thiE	>	tenI	>
scaffold1690_3_MH0086/1150-1089	thiS	>	unannotated	>	-	-	-	-	-	-
scaffold2985_2_MH0016/1187-1250	thiS	>	unannotated	>	-	-	-	-	-	-
scaffold34812_1_V1.UC-18/228-291	thiS	>	unannotated	>	unannotated	>	unannotated	>	unannotated	<
scaffold3642_3_V1.UC-7/1601-1664	thiS	>	unannotated	>	unannotated	>	unannotated	>	unannotated	<
scaffold57939_3_MH0003/129-195	thiS	>	unannotated	>	unannotated	>	unannotated	>	unannotated	>
SRS011239_C2674795/402-340	thiS	>	unannotated	>	-	-	-	-	-	-
4448818.3_Contig35874/501-573	-	-	-	-	-	-	-	-	-	-
CAM_READ_0100181925/339-412	-	-	-	-	-	-	-	-	-	-
NZ_JWIS01000007.1/66454-66387	thiS	>	thiF	>	thiG	>	thiH	>	thiE	>
longitudinal_305_68/16102-16035	thiS	>	unannotated	>	unannotated	>	unannotated	>	unannotated	>
NC_014624.2/823727-823796	thiS	>	thiF	>	thiG	>	thiH	>	tenI	>
SRS013164_Baylor_scaffold_57123/7716-7649	thiS	>	unannotated	>	unannotated	>	unannotated	>	unannotated	>
scaffold59339_9_MH0039/234-175	-	-	-	-	-	-	-	-	-	-
BMHBC_2_551569/145-80	-	-	-	-	-	-	-	-	-	-
SRS018439_C2226075/55-117	thiS	>	-	-	-	-	-	-	-	-
scaffold23118_6_V1.UC-15/1719-1793	thiS	>	unannotated	>	unannotated	>	-	-	-	-
scaffold20214_3_MH0034/599-673	thiS	>	-	-	-	-	-	-	-	-
NC_015389.1/534096-534160	thiS	>	thiF	>	thiG	>	tenI	>	ccmA	>
scaffold57580_1_MH0041/681-617	thiS	>	unannotated	>	-	-	-	-	-	-
NOF005_scaffold40202_22/2310-2246	thiS	>	unannotated	>	unannotated	>	unannotated	>	-	-
SRS018817_C1952724/75-139	thiS	>	-	-	-	-	-	-	-	-
scaffold16448_2_V1.UC-9/472-395	thiS	>	unannotated	>	-	-	-	-	-	-
DLM003_scaffold33918_3/547-609	thiS	>	-	-	-	-	-	-	-	-
contig44616/85-149	-	-	-	-	-	-	-	-	-	-
SRS020233_C4128470/632-568	thiS	>	unannotated	>	-	-	-	-	-	-
NOM016_scaffold3509_22/1125-1057	thiS	>	unannotated	>	-	-	-	-	-	-
scaffold2116_16_O2.UC-18/3441-3510	thiS	>	unannotated	>	-	-	-	-	-	-
NZ_ADGP01000005.1/75757-75827	thiS	>	thiG	>	thiH	>	putative lipoprotein	>	tenI	>
SRS020233_C4244786/625-554	thiG	>	-	-	-	-	-	-	-	-
scaffold9070_2_MH0066/187-251	thiS	>	unannotated	>	unannotated	>	unannotated	>	-	-
scaffold22145_2_MH0051/556-492	thiS	>	unannotated	>	-	-	-	-	-	-
SRMUA_GNVGR9Q01EHSK1/119-57	-	-	-	-	-	-	-	-	-	-
UnmappedStool_Broad_scaffold_432903/5434-5372	gene for protein of unannotated function	>	unannotated	>	unannotated	>	unannotated	>	-	-
NZ_KE159568.1/663304-663235	thiS	>	thiF	>	thiG	>	thiH	>	tenI	>
SRS049959_C3959253/228-162	thiS	>	-	-	-	-	-	-	-	-
NLM021_scaffold8404_12/1234-1300	thiM	>	unannotated	>	unannotated	>	unannotated	<	-	-
pre-rum103-02366/752-684	thiF	>	-	-	-	-	-	-	-	-
NOM018_scaffold47211_5/569-637	thiS	>	unannotated	>	-	-	-	-	-	-
scaffold46794_9_MH0065/1350-1412	thiS	>	unannotated	>	unannotated	>	-	-	-	-
NOM018_scaffold18669_5/1234-1306	thiS	>	unannotated	>	unannotated	>	unannotated	>	unannotated	>
SRS051031_LANL_scaffold_31518/14903-14837	thiS	>	unannotated	>	unannotated	>	unannotated	>	unannotated	>
DLF014_scaffold12672_1/59081-59015	thiS	>	unannotated	>	unannotated	>	unannotated	>	unannotated	>
scaffold29705_3_MH0020/86-151	thiS	>	unannotated	>	unannotated	>	unannotated	>	unannotated	>
NC_022571.1/2842444-2842377	thiS	>	thiF	>	thiG	>	thiH	>	thiE	>
scaffold930_13_MH0072/2055-1990	thiS	>	unannotated	>	unannotated	>	unannotated	>	-	-
longitudinal_460_20/69038-69103	thiS	>	unannotated	>	unannotated	>	unannotated	>	unannotated	>
scaffold25101_1_MH0052/368-300	thiS	>	-	-	-	-	-	-	-	-
scaffold903_4_O2.UC-20/1127-1058	thiS	>	unannotated	>	-	-	-	-	-	-
SRS015133_WUGC_scaffold_26979/1056-1125	thiS	>	unannotated	>	-	-	-	-	-	-
scaffold25705_1_MH0005/76-143	thiS	>	unannotated	>	-	-	-	-	-	-
SRS063985_C2529009/646-709	thiS	>	-	-	-	-	-	-	-	-
SRS014979_C3235211/484-416	thiS	>	thiF	>	-	-	-	-	-	-
scaffold24713_4_V1.UC-8/21688-21620	thiS	>	unannotated	>	unannotated	>	unannotated	>	unannotated	>
scaffold5788_1_O2.UC-22/6601-6669	thiS	>	-	-	-	-	-	-	-	-
DLM023_scaffold41805_6/3318-3250	thiS	>	unannotated	>	unannotated	>	unannotated	>	unannotated	>
NLM029_scaffold21631_3/2579-2647	thiS	>	unannotated	>	unannotated	>	unannotated	>	unannotated	>
UnmappedStool_Broad_scaffold_74312/4293-4226	thiS	>	unannotated	>	unannotated	>	unannotated	>	unannotated	>
SRS014923_WUGC_scaffold_21281/121-187	thiS	>	unannotated	>	unannotated	>	unannotated	>	unannotated	>
NZ_BBCG01000029.1/25947-25878	thiS	>	unannotated	>	thiG	>	thiH	>	DUF2974	>
scaffold22074_3_V1.CD-11/843-911	thiS	>	unannotated	>	unannotated	>	-	-	-	-
NLF013_scaffold11138_2/436-371	thiS	>	-	-	-	-	-	-	-	-
DHTCA2_contig26225/142-212	-	-	-	-	-	-	-	-	-	-
